1 **Effects of different cluster-set rest intervals during**  
2 **plyometric-jump training on measures of physical fitness: a**  
3 **randomized trial**

4  
5 **Short Title:** Optimal intra-set rest for cluster sets plyometrics

6  
7 Behzad Taaty Moghadam<sup>1</sup>, Hossein Shirvani<sup>1</sup>, Rodrigo Ramirez-Campillo<sup>2</sup>, Eduardo Báez-San  
8 Martín<sup>3</sup>, Ali Abdolmohamadi<sup>4</sup>, Behzad Bazgir<sup>1\*</sup>

9  
10 **1** Exercise Physiology Research Center, Lifestyle Institute, Baqiyatallah University of Medical Sciences,  
11 Tehran, Iran, **2** Exercise and Rehabilitation Sciences Institute. School of Physical Therapy. Faculty of  
12 Rehabilitation Sciences. Universidad Andres Bello. Santiago, postal code 7591538, Chile, **3** Sports Coach  
13 Career, School of Education, Universidad Viña del Mar, Viña del Mar 2520000, Chile; **3** Department of  
14 Sport Sciences, Faculty of Physical Activity and Sport Sciences, Universidad de Playa Ancha, Valparaíso  
15 2340000, Chile, **4** University of non-governmental Qadir, Langrod, Iran

16  
17 \* Correspondence to Dr. Behzad Bazgir, Exercise Physiology Research Center, Lifestyle Institute,  
18 Baqiyatallah University of Medical Sciences, P.O. Box: 14359-16471, Tehran, Iran,  
19 [behzadbazgir2@gmail.com](mailto:behzadbazgir2@gmail.com); Tel.: +98-2187552408

20

## 21 **Abstract**

22 The optimal intra-set rest in cluster sets (CLS) plyometric-jump training (PJT) to improve  
23 physical fitness remains unclear. Thus, this study compared the effects of PJT with traditional  
24 (TRS) vs. CLS structures using different intra-set rests on physical fitness components. Forty-  
25 seven recreationally active young men performed 3-5 sets of 10-12 repetitions of upper- and  
26 lower-body exercises twice a week for six weeks using different set configurations as the TRS  
27 group (no intra-set rest), and the CLS10, CLS20 and CLS30 groups with 10, 20 and 30 s intra-set  
28 rest, respectively, while the total rest period (i.e., 180 s) was equated. Testing was carried out 48  
29 h before and after the intervention and the rating of fatigue (ROF) was also assessed 20 min after  
30 the first and last session. There was no significant difference in the mean energy intake between  
31 groups ( $p > 0.05$ ). The ANCOVA revealed that all groups showed similar improvements ( $p <$   
32  $0.05$ ) in body mass, body mass index, fat-free mass, one repetition maximum (dynamic strength)  
33 and repetitions to failure (muscular endurance) in back squat and chest press, handgrip strength,  
34 standing long jump, 20 m sprint, and 9-m shuttle run (change of direction speed), whereas the  
35 ROF decreases were greater in the CLS20 and CLS30 groups ( $p < 0.05$ ). Compared to the TRS  
36 structure, six weeks of PJT with an intra-set rest of 20 s, or 30 s induced similar improvements in  
37 the measures of physical fitness and anthropometrics, with lower exercise-induced fatigue  
38 perception.

39

40 **Keywords** Stretch-shortening cycle exercise, Physical functional performance, resistance  
41 training, muscle fatigue, body composition

42

## 43 **Introduction**

44 Plyometric-jump training (PJT) mainly includes jump exercises that allow muscles to store  
45 energy during the deceleration phase of action and release it during the acceleration phase, and  
46 may be associated with muscle-tendon forces comparable to those achieved by conventional  
47 slow-speed resistance training [1, 2]. Indeed, PJT can improve muscle strength [3-7], jumping  
48 and sprinting performance [4-9], change of direction speed (CODS) [8, 10-12], and  
49 anthropometrics [13-15].

50 When designing a PJT program, one of the most important aspects that has received little  
51 attention is the ability to modify the structure of individual sets through manipulating the number  
52 of repetitions, training load, and rest periods contained within a set [16]. Indeed, the addition of a  
53 short rest period within a set has been proposed, as cluster sets (CLS) configuration, to ensure  
54 that athletes can perform at the maximum level with lower accumulated fatigue during training  
55 sessions [16, 17].

56 The literature is usually focused on comparison between CLS versus the traditional sets (TRS)  
57 method regarding physical fitness. For example, Asadi and Ramírez-Campillo (2016) concluded  
58 that the CLS method was superior in jump and CODS adaptations in physically active males  
59 after six weeks of PJT [18]. In a more recent study, Yilmaz et al. (2021) showed that both CLS  
60 and TRS plyometric training enhanced sprint time and jump performance in male soccer players  
61 [19]. Despite the support for the CLS modality in improving physical fitness, the optimal intra-  
62 set rest period to improve specific physical fitness and anthropometric components is unknown.  
63 Indeed, the CLS configuration with a 10 s [19] or 30 s [18] recovery interval within a set resulted  
64 in significant improvements in performance, with no difference compared with the TRS method.

65 Therefore, the purpose of this study was to compare the effects of PJT using the CLS method  
66 with different intra-set rest intervals on anthropometrics and physical fitness. We hypothesized  
67 that compared to shorter intra-set rest intervals, longer intra-set rest intervals would induce  
68 similar improvements in physical fitness and anthropometric factors, while inducing less muscle  
69 fatigue.

70

## 71 **Materials and methods**

### 72 **Participants**

73 This study supposed to be conducted on military forces, but due to the lack of access to a  
74 sufficient number of the relevant participants, the population was changed to active young men.  
75 However, no other changes were made in the inclusion and exclusion criteria for selecting the  
76 subjects. Therefore, a total of 52 recreationally active men aged 20-35 were recruited from five  
77 gyms of Rasht who met our inclusion criteria of exercising  $\geq 2$  sessions per week for the past 3  
78 months and were not injured. None of them had any background in regular PJT or competitive  
79 sports with any kind of jumping exercises during the trial. During the study, five subjects  
80 withdrew due to personal reasons and consequently data from 47 subjects (mean  $\pm$  standard  
81 deviation [SD]: age,  $26.5 \pm 3.9$  years; body mass,  $78 \pm 9.2$  kg; body height,  $173.7 \pm 7$  cm; body  
82 mass index [BMI],  $25.8 \pm 2$  kg/m<sup>2</sup>; body fat,  $18.8 \pm 5.2\%$ ) were included in the final analysis  
83 (Fig 1). Using a random-numbers table and a simple type of randomization, subjects were  
84 randomly divided into four groups including TRS (no intra-set rest, n = 12), CLS10 (10 s intra-  
85 set rest, n = 11), CLS20 (20 s intra-set rest, n = 13), and CLS30 (30 s intra-set rest, n = 11) and

86 their order to perform the measurements was random. After data collection, a random  
87 identification number was assigned to each subject by a person who was not involved in the  
88 study procedures, so that the authors had no access to information that could identify individual  
89 subjects. The present research was conducted in accordance with the Declaration of Helsinki. All  
90 subjects signed written informed consent and were made aware of the risks associated. This  
91 study was approved by the Research Ethics committees of Baqiyatallah Hospital  
92 ([IR.BMSU.BAQ.REC.1400.043](https://www.thaiclinicaltrials.org/show/TCTR20220210007)) and was registered by the Thai Clinical Trials Registry  
93 (<https://www.thaiclinicaltrials.org/show/TCTR20220210007>).

94 **\*\*\*Fig 1 near here\*\*\***

## 95 **Procedures**

96 This study used a between-subjects randomized design to examine the effects of PJT using the  
97 CLS structure with different rest intervals on physical fitness. The rest intervals including 0 (i.e.,  
98 the TRS configuration), 10, 20, and 30 s were compared using four independent groups while  
99 other exercise prescription components were similar between them. In this model, the intervals  
100 were manipulated so that total rest time was the same for all the four groups.

101

## 102 **Training program**

103 The program was performed from April 10, 2022, to May 18, 2022, every Sundays and every  
104 Wednesdays morning from 9:00-11:00. During the study period, subjects did not do any other  
105 exercise except the PJT protocol. Before the beginning of training and testing, all subjects  
106 participated in a familiarization session covering all training and testing requirements. The

107 training protocol comprised 2 sessions per week of 4 exercises including countermovement  
 108 jump, push-up jump, lateral skater jump, and incline push-up jump, across 6 weeks of training  
 109 (Table 1). This training duration is proposed to ensure neuromuscular adaptations without  
 110 excessive fatigue or strain [12, 18]. All training sessions were completed in a gymnasium with  
 111 rubber mat surface and subjects were required to jump for maximal effort through minimizing  
 112 their contact with the ground. Given that subjects did not have any history of formal plyometrics,  
 113 all training sessions were closely supervised and particular attention was paid to demonstration  
 114 and execution. Subjects performed a standardized warm-up at the beginning of each training  
 115 session and were asked to refrain from any additional PJT or strength training throughout the  
 116 study. All measurements were carried out 48 h before and after the training program at the same  
 117 time of day.

**Table 1. Plyometric training protocol.**

| Week | Set | Groups: Cluster<br>× Repetitions | Groups:<br>Cluster rest<br>(s) | Groups: Set<br>rest (s) | Exercise/tot<br>al rest (s) |
|------|-----|----------------------------------|--------------------------------|-------------------------|-----------------------------|
|      |     | TRS: 1 × 10-12*                  | TRS: 0                         | TRS: 90                 |                             |
| 1-2  | 3   | CLS10: 2 × 5-6                   | CLS10: 10                      | CLS10: 80               |                             |
| 3-4  | 4   |                                  |                                |                         | 90/180                      |
|      |     | CLS20: 2 × 5-6                   | CLS20: 20                      | CLS20: 70               |                             |
| 5-6  | 5   | CLS30: 2 × 5-6                   | CLS30: 30                      | CLS30: 60               |                             |

---

TRS: traditional sets, CLS: cluster sets. \*Repetitions were 10 (2×5), and 12 (2×6) at weeks 1-2, and 3-6, respectively.

118

## 119 **Anthropometric measurements**

120 Standing height was measured to the nearest 0.5 cm. Body mass and the estimation of total body  
121 fat were determined by bioelectrical impedance analysis (BF511 Monitor, Omron Healthcare,  
122 Inc. Kyoto, Japan), based on the manufacturer's guidelines, with a standard error of 3.5% for the  
123 estimation of body fat percentage. The BMI and fat-free mass (FFM) were also calculated from  
124 the standard equations (i.e., [body mass/height<sup>2</sup>] and [body mass – body fat], respectively).

125

## 126 **Muscle strength test**

127 Before the commencement of testing, a 10-min warm-up consisting of light-intensity movements  
128 and stretching and two warm-up sets of exercises with no load was performed. Lower-body (i.e.,  
129 back squat) and upper-body (i.e., chest press) dynamic strength was determined as the maximum  
130 weight lifted in a single and complete repetition (one repetition maximum [1RM]) in the same  
131 order as mentioned, according to the guidelines of the National Strength and Conditioning  
132 Association [20]. In brief, subjects performed a specific warm-up set with 5 repetitions carried  
133 out at ~50% of subject's perceived 1RM followed by 1 to 2 sets of 2–3 repetitions at a load  
134 corresponding to ~60–80% 1RM. They then performed sets of 1 repetition of increasing load for  
135 1RM determination. This procedure was completed within 4 to 5 attempts and a rest period of at  
136 least 3 min was allotted between each attempt to avoid fatigue [21]. Proper lifting technique was

137 demonstrated and practiced for each of the exercises. For evaluating grip strength on both hands,  
138 subjects were asked to maximally squeeze a hand dynamometer (78010, Lafayette, Inc. USA)  
139 without ancillary body movements, while the elbow was flexed to 90° at the side of the body.  
140 Two attempts were recorded (to the nearest 1 kg) with each hand, with at least 2 min of rest  
141 between them, and the highest records were used for the final analyses. In addition, at least 5 min  
142 of passive rest separated each strength test.

143

### 144 **Standing long jump (SLJ)**

145 Subjects performed the SLJ test two times, and the best record was used for data analysis. They  
146 were asked to execute a two-legged horizontal jump as far as possible out of a standing position  
147 with swinging arms and flexing knees. The distance from the beginning of the starting line to the  
148 most posterior aspect of the subject's body was measured in cm by the same examiner.

149

### 150 **Change of direction speed (CODS) and linear sprinting speed tests**

151 The CODS performance was determined by a 9-m shuttle run test on a hardcourt track marked  
152 with tapes and pylons. During the test, subjects sprint forward for 9 m and come back to the  
153 starting line. They passed the distance four times and had to touch the tapes at the end of the first  
154 three 9-m distances with either the left or the right hand. For assessing sprinting ability, a linear  
155 20 m sprinting test was performed. In doing so, a standard hardcourt sprint track of 20 m length  
156 was prepared by setting up pylons and the starting and finishing lines were marked by white  
157 tapes on the floor. At the end of both tracks, there was enough space for subjects to continue



158 moving until they stopped completely. Subjects started out of a standing position and had two  
159 attempts for each test with a 2-3 min rest period. A standard stopwatch was used to record time  
160 and the best time in seconds was used for data analysis. All measurements were conducted by the  
161 same examiner (blinded regarding subject's groups allocation) who had practiced many times to  
162 become fully familiar with the device and to reduce the possible error of measurements.

163

### 164 **Local muscular endurance test**

165 Subjects performed a set of maximum number of repetitions at 60% of 1RM. Once the back  
166 squat testing was finished, the chest press was conducted after a 4-5 min passive rest [21, 22].  
167 Subjects were encouraged to perform as many repetitions as possible using the proper lifting  
168 techniques and the total number of proper repetitions performed was recorded.

169

### 170 **Perceived fatigue**

171 This was determined using a new 11-point numerical scale ranging from zero to ten, called rating  
172 of fatigue (ROF), effective and valid in assessing changes in fatigue in a variety of contexts [23].  
173 Twenty minutes after the first and last training session, each subject rated how fatigued they felt  
174 according to the numbers from 0 (referred to not fatigued at all) to 10 (referred to total fatigue  
175 and exhaustion). All subjects were thoroughly explained how to rate their perceived fatigue  
176 during the familiarization session.

177

## 178 **Diet control**

179 Subjects were asked to maintain their habitual diets throughout the study. Written and verbal  
180 instructions were provided so that subjects could record the type and portion sizes of daily foods  
181 consumed 48 h before pre-test measurements. They also were instructed to mimic this diet 48 h  
182 before the post-test measurements. Dietary data analysis revealed no significant differences  
183 between groups before pre- and post-test sessions (Fig 2).

184 **\*\*\*Fig 2 near here\*\*\***

## 185 **Statistical analysis**

186 The sample size was calculated using an a priori power analysis by G\*Power software,  
187 version 3.1.9.4. Given a statistical power (1- $\beta$  error) of 0.9 and a moderate effect size (ES) of 0.6,  
188 the total sample size resulted in 44 subjects. However, considering a 20% drop out rate, the  
189 minimal sample size was set at 52 subjects. The Statistical Package for Social Science (SPSS, v.  
190 22<sup>®</sup>, Inc. Chicago, IL) was used to analyze data at an alpha level of  $p \leq 0.05$  for all tests. Pre- and  
191 post-intervention values for each dependent variable were analyzed to determine if the  
192 distributions were normal using the Shapiro-Wilk test. A paired-samples  $t$  test was applied to  
193 establish if there was a potential difference in each group's mean values from pre- to post-  
194 training (within-group analysis). An analysis of covariance (ANCOVA) was conducted for the  
195 dependent variable difference scores (post – pre) with pre-test values as covariates. Moreover,  
196 Cohen's  $d$  was also calculated as ES statistic and the magnitudes were considered trivial ( $< 0.2$ ),  
197 small ( $0.2 \leq d < 0.5$ ), medium ( $0.5 \leq d < 0.8$ ), and large ( $0.8 \leq$ ) [21].

198

## 199 Results

200 Means and SDs for body mass, BMI, body fat percentage, and FFM are listed in Table 2. The  
 201 within-group comparisons indicated a significant reduction in body mass and BMI and an  
 202 increase in FFM for all groups following the training program. However, no significant  
 203 differences were found between groups in any of the outcomes ( $p > 0.05$ ).

204

**Table 2. Changes in anthropometric outcomes following six weeks of plyometric training in traditional sets (TRS) group with no intra-set rest, and three cluster sets (CLS) groups with 10 (CLS10), 20 (CLS20), and 30 (CLS30) seconds intra-set rest.**

| Variable              | Research groups |                 |                 |                 | ANCOVA |                |
|-----------------------|-----------------|-----------------|-----------------|-----------------|--------|----------------|
|                       | TRS<br>(n=12)   | CLS10<br>(n=11) | CLS20<br>(n=13) | CLS30<br>(n=11) | F      | <i>p</i> value |
| <b>Body mass (kg)</b> |                 |                 |                 |                 |        |                |
| Pre                   | 75.8 (7.5)      | 76.7 (9.4)      | 81.4 (10.1)     | 77.9 (9.7)      |        |                |
| Post                  | 76.9 (8.2) *    | 77.5 (9.2) *    | 82 (9.7) *      | 78.7 (10.3) *   |        |                |
| % of change           | 1.5 (1.8)       | 1 (1.2)         | 0.7 (1)         | 1 (1.4)         | 0.74   | 0.534          |
| ES                    | 0.80            | 0.76            | 0.61            | 0.72            |        |                |

|                               |            |              |              |              |      |       |
|-------------------------------|------------|--------------|--------------|--------------|------|-------|
| Paired t                      | -2.76      | -2.53        | -2.20        | -2.39        |      |       |
| p value                       | 0.019      | 0.030        | 0.048        | 0.038        |      |       |
| <b>BMI (kg/m<sup>2</sup>)</b> |            |              |              |              |      |       |
| Pre                           | 25.8 (1.7) | 25.4 (2.7)   | 26 (2.4)     | 26 (1.3)     |      |       |
| Post                          | 26.2 (2) * | 25.7 (2.7) * | 26.1 (2.3) * | 26.3 (1.5) * |      |       |
| % of change                   | 1.5 (1.8)  | 1 (1.2)      | 0.7 (1)      | 1 (1.4)      | 0.82 | 0.492 |
| ES                            | 0.80       | 0.79         | 0.63         | 0.70         |      |       |
| Paired t                      | -2.77      | -2.62        | -2.27        | -2.32        |      |       |
| p value                       | 0.018      | 0.025        | 0.042        | 0.043        |      |       |
| <b>Body fat (%)</b>           |            |              |              |              |      |       |
| Pre                           | 17.3 (5.3) | 19 (6)       | 20.2 (5)     | 18.4 (4.6)   |      |       |
| Post                          | 16.6 (5.8) | 18.3 (6.6)   | 19.6 (6.2)   | 17.9 (5.6)   |      |       |
| % of change                   | -4.7 (8.7) | -4.3 (9.8)   | -5.1 (9.2)   | -4.2 (8.5)   | 0.25 | 0.858 |
| ES                            | 0.50       | 0.44         | 0.49         | 0.39         |      |       |

|                 |            |            |              |              |      |       |
|-----------------|------------|------------|--------------|--------------|------|-------|
| Paired t        | 1.74       | 1.47       | 1.76         | 1.29         |      |       |
| <i>p</i> value  | 0.110      | 0.172      | 0.104        | 0.225        |      |       |
| <b>FFM (kg)</b> |            |            |              |              |      |       |
| Pre             | 62.5 (6.2) | 61.9 (6.4) | 64.6 (5.7)   | 63.4 (7.9)   |      |       |
| Post            | 64 (7) **  | 63 (6.7) * | 65.5 (5.4) * | 64.5 (8.5) * |      |       |
| % of change     | 2.3 (2.1)  | 1.8 (2.1)  | 1.4 (2.1)    | 1.5 (2.2)    |      |       |
|                 |            |            |              |              | 0.49 | 0.689 |
| ES              | 1.05       | 0.78       | 0.67         | 0.69         |      |       |
| Paired t        | -3.63      | -2.58      | -2.42        | -2.29        |      |       |
| <i>p</i> value  | 0.004      | 0.027      | 0.032        | 0.045        |      |       |

---

Values are mean (standard deviation). BMI: body mass index, FFM: fat-free mass, ES: effect size, ANCOVA: analysis of covariance.

\*  $p < 0.05$ , and \*\*  $p \leq 0.01$  vs. pre-test

205 Compared to their pre-training values, all four training groups showed significant improvements  
 206 in relative lower- and upper-body strength, relative handgrip strength, local muscular endurance,  
 207 SLJ, linear sprint, and the CODS performance, with no difference between groups (Fig 3-a to 3-  
 208 j). Although ROF scores were significantly decreased (improved) from pre- to post-training in all

209 four training groups, the CLS20 and CLS30 groups exhibited greater improvements compared to  
210 the TRS and CLS10 groups (Fig 4).

211 **\*\*\*Fig 3 and 4 near here\*\*\***

## 212 **Discussion**

213 In recent years, PJT protocols have been modified by incorporating a brief intra-set rest period  
214 (i.e., 10 to 30 s) aimed toward lower exercise exertion. Such protocols, called CLS configuration,  
215 have been shown to be effective in enhancing sprint, jump and the CODS performance [18, 19].  
216 In the present study, we compared the effects of different rest intervals during the CLS structure  
217 used in PJT on physical fitness factors in recreationally active men. In fact, to our knowledge,  
218 this is the first study that has investigated physical fitness adaptations to manipulating the intra-  
219 set rest period.

220 After 6 weeks, we observed that body composition variables changed in all groups, except body  
221 fat percentage. Although there was no statistically significant difference between groups, the  
222 TRS group showed large ESs body mass and BMI reduction and FFM increase compared to  
223 medium ESs for the CLS groups. These findings suggest that short-term PJT without intra-set  
224 rest recovery may be more effective in improving body composition through increasing FFM,  
225 with no effect on body fat percentage. These observations agree with previous findings,  
226 indicating that PJT is associated with increasing FFM without changing fat mass [24]. In  
227 contrast, MacDonald et al. (2012) reported a significant gain in body fat percentage following 9  
228 weeks of TRS plyometric training, which these changes were probably attributed to changes in  
229 subjects' diet rather than the training protocol [14]. In another study [25], PJT did not change  
230 BMI in volleyball players that is in contrary to the present findings. This may be attributed to

231 differences in training program (upper-body vs. upper- and lower-body plyometrics in our study)  
232 and subjects (professional volleyball players vs. recreationally active men in our study).  
233 Professional athletes achieve adaptations in which further alterations in body composition may  
234 require higher intensity and volume of training.

235 Fig 3-a to 3-d represent the changes in relative strength measures that occurred in groups after 6  
236 weeks of training. The ES statistic obtained for the CLS20 (back squat,  $d = -1.2$ ; chest press,  $d =$   
237  $-2.5$ ) and CLS30 (back squat,  $d = -1.1$ ; chest press,  $d = -2.3$ ) groups was greater than the TRS  
238 (back squat,  $d = -0.74$ ; chest press,  $d = -1.2$ ) and CLS10 (back squat,  $d = -0.9$ ; chest press,  $d = -1$ )  
239 groups. Nonetheless, similar results were not observed for the right- and left-hand handgrip.  
240 These results were further supported by previous studies indicating the effectiveness of  
241 plyometrics in enhancing maximal dynamic strength [14, 25, 26]. Although it has been proposed  
242 that 6 weeks of PJT may not be enough to induce hypertrophic changes [14], our findings show a  
243 significant 1.4 to 2.3% increase in FFM that can almost be indicative of hypertrophic effects.  
244 Thus, in addition to neural adaptations, it can be conceived that part of the increase in muscle  
245 strength observed in this study may be due to an increase in muscle mass. Altogether, further  
246 research with a longer duration is needed to establish hypertrophy-induced increase in muscle  
247 strength after PJT.

248 A novel finding in the present study was that all groups significantly improved local muscular  
249 endurance in chest press (6.4-8.6%) and back squat (5.4-7.4%), whereas the respective ES values  
250 were high, with a greater magnitude for the TRS group than others (Fig 3-e and 3-f). These  
251 results are important due to the lack of sufficient data in this area. Indeed, despite contributing to  
252 muscle strength, power and sprint as was previously confirmed [2, 14, 18, 19], we here found

253 that PJT using both TRS and CLS configurations was able to enhance maximum number of  
254 repetitions to failure at 60% of 1RM, which in line with the study conducted by Al Ameer (2020)  
255 even though the muscle group examined in that study was different. The author reported that a  
256 12-week twice weekly PJT program resulted in better sit-ups records in adult soccer players  
257 compared with pre-tests [27]. An important point to note is that we re-adjusted the load in the  
258 post-study assessment according to the newly established 1RM, which can partially eliminate the  
259 effects of increasing muscle strength on the results. Therefore, the improved local muscular  
260 endurance in this research would likely be related to an enhanced oxidative and buffering  
261 capacity, an increase in capillarization and mitochondrial volume, and an improve in metabolic  
262 enzyme activity [28].

263 All groups significantly enhanced the CODS (2.2-2.6%) and linear sprint (3.1-3.3%)  
264 performance, but the respective ESs were moderate to high (Fig 3-g and 3-h). Although some  
265 authors have reported no effect of PJT on 20 m sprint [29] and the CODS [30, 31] records, our  
266 findings add consistently to previous works showing that sprint ability and the CODS  
267 performance improved by 2.7% and 3.8% [19], and 6.3% and 5.5% [18], respectively, following  
268 6 weeks of PJT with the CLS structure. These improvements might be attributed to several  
269 reasons. First, the increased muscle strength of the study subjects might offer one explanation.  
270 Specifically, the increased back squat strength occurred in this study can positively transferred  
271 into sprint ability [32] and is also strongly correlated with CODS [33]. The second explanation is  
272 related to neuromuscular adaptations such as greater motor unit recruitment which in turn  
273 enhance muscle power output and force development ability [12, 18]. Third, PJT may induce  
274 positive effects on key elements of sprint and the CODS tasks including lower ground contact  
275 times as a result of high muscular force output [18, 34], the rate of force development, and the



276 increased efficiency in using the stretch-shortening cycle (SSC) during ballistic tasks [8] even  
277 though we did not measure these parameters.

278 Another important change observed in this study was the increase in the SLJ distance (2.8-3.2%)  
279 in all four groups after the training period (Fig 3-i). The calculated ES statistics ranged between  
280 1.3 and 2, while the greater magnitude was related to the CLS20 group (Fig 3-j). Most previous  
281 studies have found significant improvements in jumping performance as a result of short-term  
282 PJT [4, 18, 19, 34-36], supporting our results and the principle of specificity in training. There  
283 are several explanations for the positive effects of plyometrics, mainly related to neural  
284 adaptations, including changes in muscle structure and individual fiber mechanics, enhanced  
285 neuro-muscular coordination, changes in mechanical stiffness properties of tendons and the  
286 greater efficiency to utilize the muscles SSC [18, 34]. Regardless of these reasons, part of the  
287 improvements may be due to the increase in FFM of subjects in all groups and subsequent  
288 increase in muscular power output and the rate of force development.

289 Regarding ROF differences between groups (Fig 4), our results reveal a significant decrease in  
290 ROF scores in all groups, but the magnitude of decreases in the CLS20 (13.3%,  $d = 0.7$ ) and  
291 CLS30 (14.8%,  $d = 0.7$ ) groups was significantly greater than those of TRS (11.6%,  $d = 0.87$ )  
292 and CLS10 (12.2%,  $d = 0.94$ ). In fact, the ROF score in all groups was lower after training, even  
293 considering that the number of sets and repetitions were greater in the last training session  
294 compared to the first week. Importantly, despite the total rest period (i.e., 180 s) was similar  
295 among groups, subjects who performed PJT with a 20 or 30 s intra-set rest interval felt less  
296 exercise-induced fatigue. Here, we used the ROF scale that is a valid, simple and sensitive  
297 instrument capable of tracking fatigue perception through exercise and recovery [23]. Depletion

298 of muscle creatine content [37], pH drop due to lactate accumulation, and muscle glycogen  
299 depletion [38] can be among the possible metabolic causes of exercise-induced fatigue. By  
300 continuing to jump during plyometric exercise, tension develops in muscles and they provide the  
301 necessary force to continue exercise through increasing motor unit recruitment and firing  
302 frequency [38]. Greater motor unit recruitment, in turn, can increase more signals to the sensory  
303 cortex [38, 39] and subsequently increase the perceptions of exertion and fatigue. However, it is  
304 difficult to discuss more about these metabolic and neuromotor factors because we did not assess  
305 them independently. Therefore, more research needs to be done comparing the PJT protocols in  
306 the CLS and TRS methods with respect to the mentioned variables

307

## 308 **Conclusions**

309 A six-week upper- and lower-body PJT program improved physical fitness and anthropometric  
310 measures in active young men, independent from set rest configurations. However, a CLS20 and  
311 CLS30 configuration seems to achieve greater improvements in fatigue perception reduction.  
312 The present findings provide interesting practical relevance in designing optimal plyometric  
313 training protocols using the CLS or TRS configuration for optimal physical fitness and body  
314 composition improvements, in line with reduced perceived fatigue, a key element for long-term  
315 physical activity habits.

316

## 317 **Supporting information**

318 **S1 File. PLOS' questionnaire on inclusivity in global research. (DOCX)**

319 **S2 File. CONSORT checklist.** (PDF)

320 **S3 File. The study protocol.** (PDF)

321 **S4 File. Excel datasets for dietary data analysis.** Fig 2 is released from these datasets. (XLSX)

322 **S5 File. Excel datasets for anthropometric and physical fitness factors analysis.** Table 2, and

323 Fig 3 and 4 are released from these datasets. (XLSX)

324

## 325 **Acknowledgments**

326 The authors would like to thank all subjects who volunteered to participate in this research. We

327 also are grateful to Dr. Nader Samami for his invaluable contribution to the study.

328

## 329 **Author Contributions**

330 **Conceptualization:** Behzad Taaty Moghadam, Hossein Shirvani, Behzad Bazgir.

331 **Data curation:** Behzad Taaty Moghadam. Ali Abdolmohamadi.

332 **Formal analysis:** Behzad Taaty Moghadam, Rodrigo Ramirez-Campillo, Eduardo Báez-San

333 Martín.

334 **Investigation:** Behzad Taaty Moghadam, Rodrigo Ramirez-Campillo, Eduardo Báez-San

335 Martín.

336 **Methodology:** Behzad Taaty Moghadam, Hossein Shirvani, Behzad Bazgir.

337 **Project administration:** Behzad Taaty Moghadam.

338 **Resources:** Hossein Shirvani, Behzad Bazgir, Rodrigo Ramirez-Campillo.

339 **Software:** Behzad Taaty Moghadam.

340 **Supervision:** Hossein Shirvani, Behzad Bazgir.

341 **Validation:** Behzad Taaty Moghadam, Behzad Bazgir, Rodrigo Ramirez-Campillo, Eduardo

342 Báez-San Martín.

343 **Visualization:** Behzad Taaty Moghadam.

344 **Writing – original draft:** Behzad Taaty Moghadam, Ali Abdolmohamadi, Behzad Bazgir.

345 **Writing – review & editing:** Rodrigo Ramirez-Campillo, Eduardo Báez-San Martín.

346

## 347 **References**

- 348 1. Holcomb WR, Lander JE, Rutland RM, Wilson GD. The effectiveness of a modified  
349 plyometric program on power and the vertical jump. *J Strength Cond Res.* 1996;10(2):89-92.
- 350 2. Fatouros IG, Jamurtas AZ, Leontsini D, Taxildaris K, Aggelousis N, Kostopoulos N, et  
351 al. Evaluation of plyometric exercise training, weight training, and their combination on vertical  
352 jumping performance and leg strength. *J Strength Cond Res.* 2000;14(4):470-6.
- 353 3. Saez-Saez de Villarreal E, Requena B, Newton RU. Does plyometric training improve  
354 strength performance? A meta-analysis. *J Sci Med Sport.* 2010;13(5):513-22.
- 355 4. Arazi H, Mohammadi M, Asadi A. Muscular adaptations to depth jump plyometric  
356 training: Comparison of sand vs. land surface. *Interv Med Appl Sci.* 2014;6(3):125-30. Epub  
357 2014/09/23. doi: 10.1556/imas.6.2014.3.5. PubMed PMID: 25243078; PubMed Central PMCID:  
358 PMCPMC4168734.
- 359 5. Markovic G, Mikulic P. Neuro-Musculoskeletal and Performance Adaptations to Lower-  
360 Extremity Plyometric Training. *Sports Med.* 2010;40(10):859-95. doi: 10.2165/11318370-  
361 000000000-00000.
- 362 6. Ramírez-delaCruz M, Bravo-Sánchez A, Esteban-García P, Jiménez F, Abián-Vicén J.  
363 Effects of Plyometric Training on Lower Body Muscle Architecture, Tendon Structure, Stiffness  
364 and Physical Performance: A Systematic Review and Meta-analysis. *Sports Med Open.*  
365 2022;8(1):40. doi: 10.1186/s40798-022-00431-0.
- 366 7. Oxfeldt M, Overgaard K, Hvid LG, Dalgas U. Effects of plyometric training on jumping,  
367 sprint performance, and lower body muscle strength in healthy adults: A systematic review and

- 368 meta-analyses. *Scand J Med Sci Sports*. 2019;29(10):1453-65. doi:  
369 <https://doi.org/10.1111/sms.13487>.
- 370 8. Asadi A, Arazi H. Effects of high-intensity plyometric training on dynamic balance,  
371 agility, vertical jump and sprint performance in young male basketball players. *J Sport Health*  
372 *Sci*. 2012;4(1):35-44.
- 373 9. Sáez de Villarreal E, Requena B, Cronin JB. The effects of plyometric training on sprint  
374 performance: A meta-analysis. *J Strength Cond Res*. 2012;26(2):575-84. doi:  
375 10.1519/JSC.0b013e318220fd03.
- 376 10. Čaprić I, Stanković M, Manić M, Preljević A, Špirtović O, Đorđević D, et al. Effects of  
377 plyometric training on agility in male soccer players—a systematic review. *J Men's Health*.  
378 2022;18(7):147-58. doi: 10.31083/j.jomh1807147.
- 379 11. Asadi A, Arazi H, Ramirez-Campillo R, Moran J, Izquierdo M. Influence of Maturation  
380 Stage on Agility Performance Gains After Plyometric Training: A Systematic Review and Meta-  
381 analysis. *J Strength Cond Res*. 2017;31(9):2609-17. Epub 2017/05/31. doi:  
382 10.1519/jsc.0000000000001994. PubMed PMID: 28557853.
- 383 12. Miller MG, Herniman JJ, Ricard MD, Cheatham CC, Michael TJ. The effects of a 6-  
384 week plyometric training program on agility. *J Sports Sci Med*. 2006;5(3):459-65. Epub  
385 2006/01/01. PubMed PMID: 24353464; PubMed Central PMCID: PMCPMC3842147.
- 386 13. Ramirez-Campillo R, García-Pinillos F, Nikolaidis PT, Clemente FM, Gentil P, García-  
387 Hermoso A. Body composition adaptations to lower-body plyometric training: a systematic  
388 review and meta-analysis. *Biol Sport*. 2022;39(2):273-87. Epub 2022/03/22. doi:  
389 10.5114/biolSport.2022.104916. PubMed PMID: 35309540; PubMed Central PMCID:  
390 PMCPMC8919888.
- 391 14. MacDonald CJ, Lamont HS, Garner JC. A comparison of the effects of 6 weeks of  
392 traditional resistance training, plyometric training, and complex training on measures of strength  
393 and anthropometrics. *J Strength Cond Res*. 2012;26(2):422-31. Epub 2012/01/14. doi:  
394 10.1519/JSC.0b013e318220df79. PubMed PMID: 22240547.
- 395 15. Grgic J, Schoenfeld BJ, Mikulic P. Effects of plyometric vs. resistance training on  
396 skeletal muscle hypertrophy: A review. *J Sport Health Sci*. 2021;10(5):530-6. doi:  
397 <https://doi.org/10.1016/j.jshs.2020.06.010>.
- 398 16. Tufano JJ, Brown LE, Haff GG. Theoretical and practical aspects of different cluster set  
399 structures: a systematic review. *J Strength Cond Res*. 2017;31(3):848-67.
- 400 17. Haff GG, Hobbs RT, Haff EE, Sands WA, Pierce KC, Stone MH. Cluster training: A  
401 novel method for introducing training program variation. *J Strength Cond Res*. 2008;30(1):67-  
402 76.
- 403 18. Asadi A, Ramírez-Campillo R. Effects of cluster vs. traditional plyometric training sets  
404 on maximal-intensity exercise performance. *Medicina*. 2016;52(1):41-5.
- 405 19. Yilmaz N, Alemdaroğlu U, Köklü Y, Türkdöğän H, Aşçi A. The effect of a six-week  
406 plyometric training performed with different set configurations on explosive performance:  
407 cluster vs. traditional set configurations. *Journal of sports medicine physical fitness*.  
408 2021;61(7):892-8.
- 409 20. Baechle TR, Earle RW. *Essentials of strength training and conditioning: Human kinetics*;  
410 2008.
- 411 21. Arazi H, Aboutalebi S, Taati B, Cholewa JM, Candow DG. Effects of short-term betaine  
412 supplementation on muscle endurance and indices of endocrine function following acute high-

- 413 intensity resistance exercise in young athletes. *J Int Soc Sports Nutr.* 2022;19(1):1-16. doi:  
414 10.1080/15502783.2022.2041988.
- 415 22. Campos GE, Luecke TJ, Wendeln HK, Toma K, Hagerman FC, Murray TF, et al.  
416 Muscular adaptations in response to three different resistance-training regimens: specificity of  
417 repetition maximum training zones. *Eur J Appl Physiol.* 2002;88(1):50-60. doi: 10.1007/s00421-  
418 002-0681-6.
- 419 23. Micklewright D, St Clair Gibson A, Gladwell V, Al Salman A. Development and  
420 Validity of the Rating-of-Fatigue Scale. *Sports Med.* 2017;47(11):2375-93. Epub 2017/03/12.  
421 doi: 10.1007/s40279-017-0711-5. PubMed PMID: 28283993; PubMed Central PMCID:  
422 PMC5633636.
- 423 24. Nobre GG, de Almeida MB, Nobre IG, Dos Santos FK, Brinco RA, Arruda-Lima TR, et  
424 al. Twelve weeks of plyometric training improves motor performance of 7- to 9-year-old boys  
425 who were overweight/obese: a randomized controlled intervention. *J Strength Cond Res.*  
426 2017;31(8):2091-9. Epub 2016/10/28. doi: 10.1519/jsc.0000000000001684. PubMed PMID:  
427 27787471.
- 428 25. Valadés Cerrato D, Palao JM, Femia P, Ureña A. Effect of eight weeks of upper-body  
429 plyometric training during the competitive season on professional female volleyball players. *J*  
430 *Sports Med Phys Fitness.* 2018;58(10):1423-31. Epub 2017/07/27. doi: 10.23736/s0022-  
431 4707.17.07527-2. PubMed PMID: 28745472.
- 432 26. Sáez de Villarreal E, Requena B, Izquierdo M, Gonzalez-Badillo JJ. Enhancing sprint and  
433 strength performance: combined versus maximal power, traditional heavy-resistance and  
434 plyometric training. *J Sci Med Sport.* 2013;16(2):146-50. Epub 2012/06/26. doi:  
435 10.1016/j.jsams.2012.05.007. PubMed PMID: 22727979.
- 436 27. Al Ameer A. Impact of Plyometric and Resistance Training on Selected Fitness Variables  
437 among University Soccer Playing Adults. *Ann Appl Sport Sci.* 2020;8(3):e817. doi:  
438 10.29252/aassjournal.817.
- 439 28. Schoenfeld BJ, Grgic J, Van Every DW, Plotkin DL. Loading recommendations for  
440 muscle strength, hypertrophy, and local endurance: a re-examination of the repetition continuum.  
441 *Sports.* 2021;9(2):32.
- 442 29. Ramirez-Campillo R, Andrade DC, Alvarez C, Henríquez-Olguín C, Martínez C, Báez-  
443 Sanmartín E, et al. The effects of interset rest on adaptation to 7 weeks of explosive training in  
444 young soccer players. *J Sports Sci Med.* 2014;13(2):287-96. Epub 2014/05/03. PubMed PMID:  
445 24790481; PubMed Central PMCID: PMC3990881.
- 446 30. Markovic G, Jukic I, Milanovic D, Metikos D. Effects of sprint and plyometric training  
447 on muscle function and athletic performance. *J Strength Cond Res.* 2007;21(2):543-9. Epub  
448 2007/05/29. doi: 10.1519/r-19535.1. PubMed PMID: 17530960.
- 449 31. Thomas K, French D, Hayes PR. The effect of two plyometric training techniques on  
450 muscular power and agility in youth soccer players. *J Strength Cond Res.* 2009;23(1):332-5.  
451 Epub 2008/11/13. doi: 10.1519/JSC.0b013e318183a01a. PubMed PMID: 19002073.
- 452 32. Seitz LB, Reyes A, Tran TT, Saez de Villarreal E, Haff GG. Increases in lower-body  
453 strength transfer positively to sprint performance: a systematic review with meta-analysis. *Sports*  
454 *Med.* 2014;44(12):1693-702. Epub 2014/07/26. doi: 10.1007/s40279-014-0227-1. PubMed  
455 PMID: 25059334.

- 456 33. Suchomel TJ, Nimphius S, Stone MH. The Importance of Muscular Strength in Athletic  
457 Performance. *Sports Med.* 2016;46(10):1419-49. Epub 2016/02/04. doi: 10.1007/s40279-016-  
458 0486-0. PubMed PMID: 26838985.
- 459 34. Sáez de Villarreal E, Kellis E, Kraemer WJ, Izquierdo M. Determining variables of  
460 plyometric training for improving vertical jump height performance: a meta-analysis. *J Strength*  
461 *Cond Res.* 2009;23(2):495-506. Epub 2009/02/07. doi: 10.1519/JSC.0b013e318196b7c6.  
462 PubMed PMID: 19197203.
- 463 35. Neves da Silva VF, Aguiar SDS, Sousa CV, Sotero RDC, Filho JMS, Oliveira I, et al.  
464 Effects of short-term plyometric training on physical fitness parameters in female futsal athletes.  
465 *J Phys Ther Sci.* 2017;29(5):783-8. Epub 2017/06/13. doi: 10.1589/jpts.29.783. PubMed PMID:  
466 28603345; PubMed Central PMCID: PMC5462672.
- 467 36. Sáez de Villarreal E, González-Badillo JJ, Izquierdo M. Low and moderate plyometric  
468 training frequency produces greater jumping and sprinting gains compared with high frequency.  
469 *J Strength Cond Res.* 2008;22(3):715-25. Epub 2008/04/29. doi:  
470 10.1519/JSC.0b013e318163eade. PubMed PMID: 18438249.
- 471 37. Gagnon M, Maguire M, MacDermott M, Bradford A. Effects of creatine loading and  
472 depletion on rat skeletal muscle contraction. *Clin Exp Pharmacol Physiol.* 2002;29(10):885-90.  
473 Epub 2002/09/05. doi: 10.1046/j.1440-1681.2002.03745.x. PubMed PMID: 12207567.
- 474 38. Asadi A. Monitoring plyometric exercise intensity using rating of perceived exertion  
475 scale. *Phys Act Rev.* 2014;2(2):10-5.
- 476 39. Lagally KM, Robertson RJ, Gallagher KI, Goss FL, Jakicic JM, Lephart SM, et al.  
477 Perceived exertion, electromyography, and blood lactate during acute bouts of resistance  
478 exercise. *Med Sci Sports Exerc.* 2002;34(3):552-9; discussion 60. Epub 2002/03/07. doi:  
479 10.1097/00005768-200203000-00025. PubMed PMID: 11880823.
- 480

481 **Figures captions**

482

483 **Fig 1.** Recruitment flowchart from enrolment to data analysis.

484 **Fig 2.** Mean of dietary and energy intake 48 h before pre-testing (left column for each group) and  
485 post-testing (right column for each group).

486 **Fig 3.** Changes in performance parameters, and percentage change and effect size for a-b)  
487 muscle strength, c-d) handgrip strength, e-f) local muscular endurance, g-h) sprint and change of  
488 direction speed, and i-j) standing long jump, after six weeks of plyometric jump training in  
489 traditional sets (TRS) group with no intra-set rest, and three cluster sets (CLS) groups with 10  
490 (CLS10), 20 (CLS20), and 30 (CLS30) seconds intra-set rest. Fig a, c, e, g, i: white and orange  
491 columns denote outcomes results before and after the intervention. Moreover, each circle  
492 corresponds to a single subject. Fig b, d, f, h, j: the columns and circles correspond to the left and  
493 right y axis, respectively.

494 **Fig 4.** Changes in a) the rating of fatigue, and b) percentage change and effect size, after six  
495 weeks of plyometric jump training in traditional sets (TRS) group with no intra-set rest, and three  
496 cluster sets (CLS) groups with 10 (CLS10), 20 (CLS20), and 30 (CLS30) seconds intra-set rest.  
497 Fig a: white and orange columns denote outcomes results before and after the intervention.  
498 Moreover, each circle corresponds to a single subject.



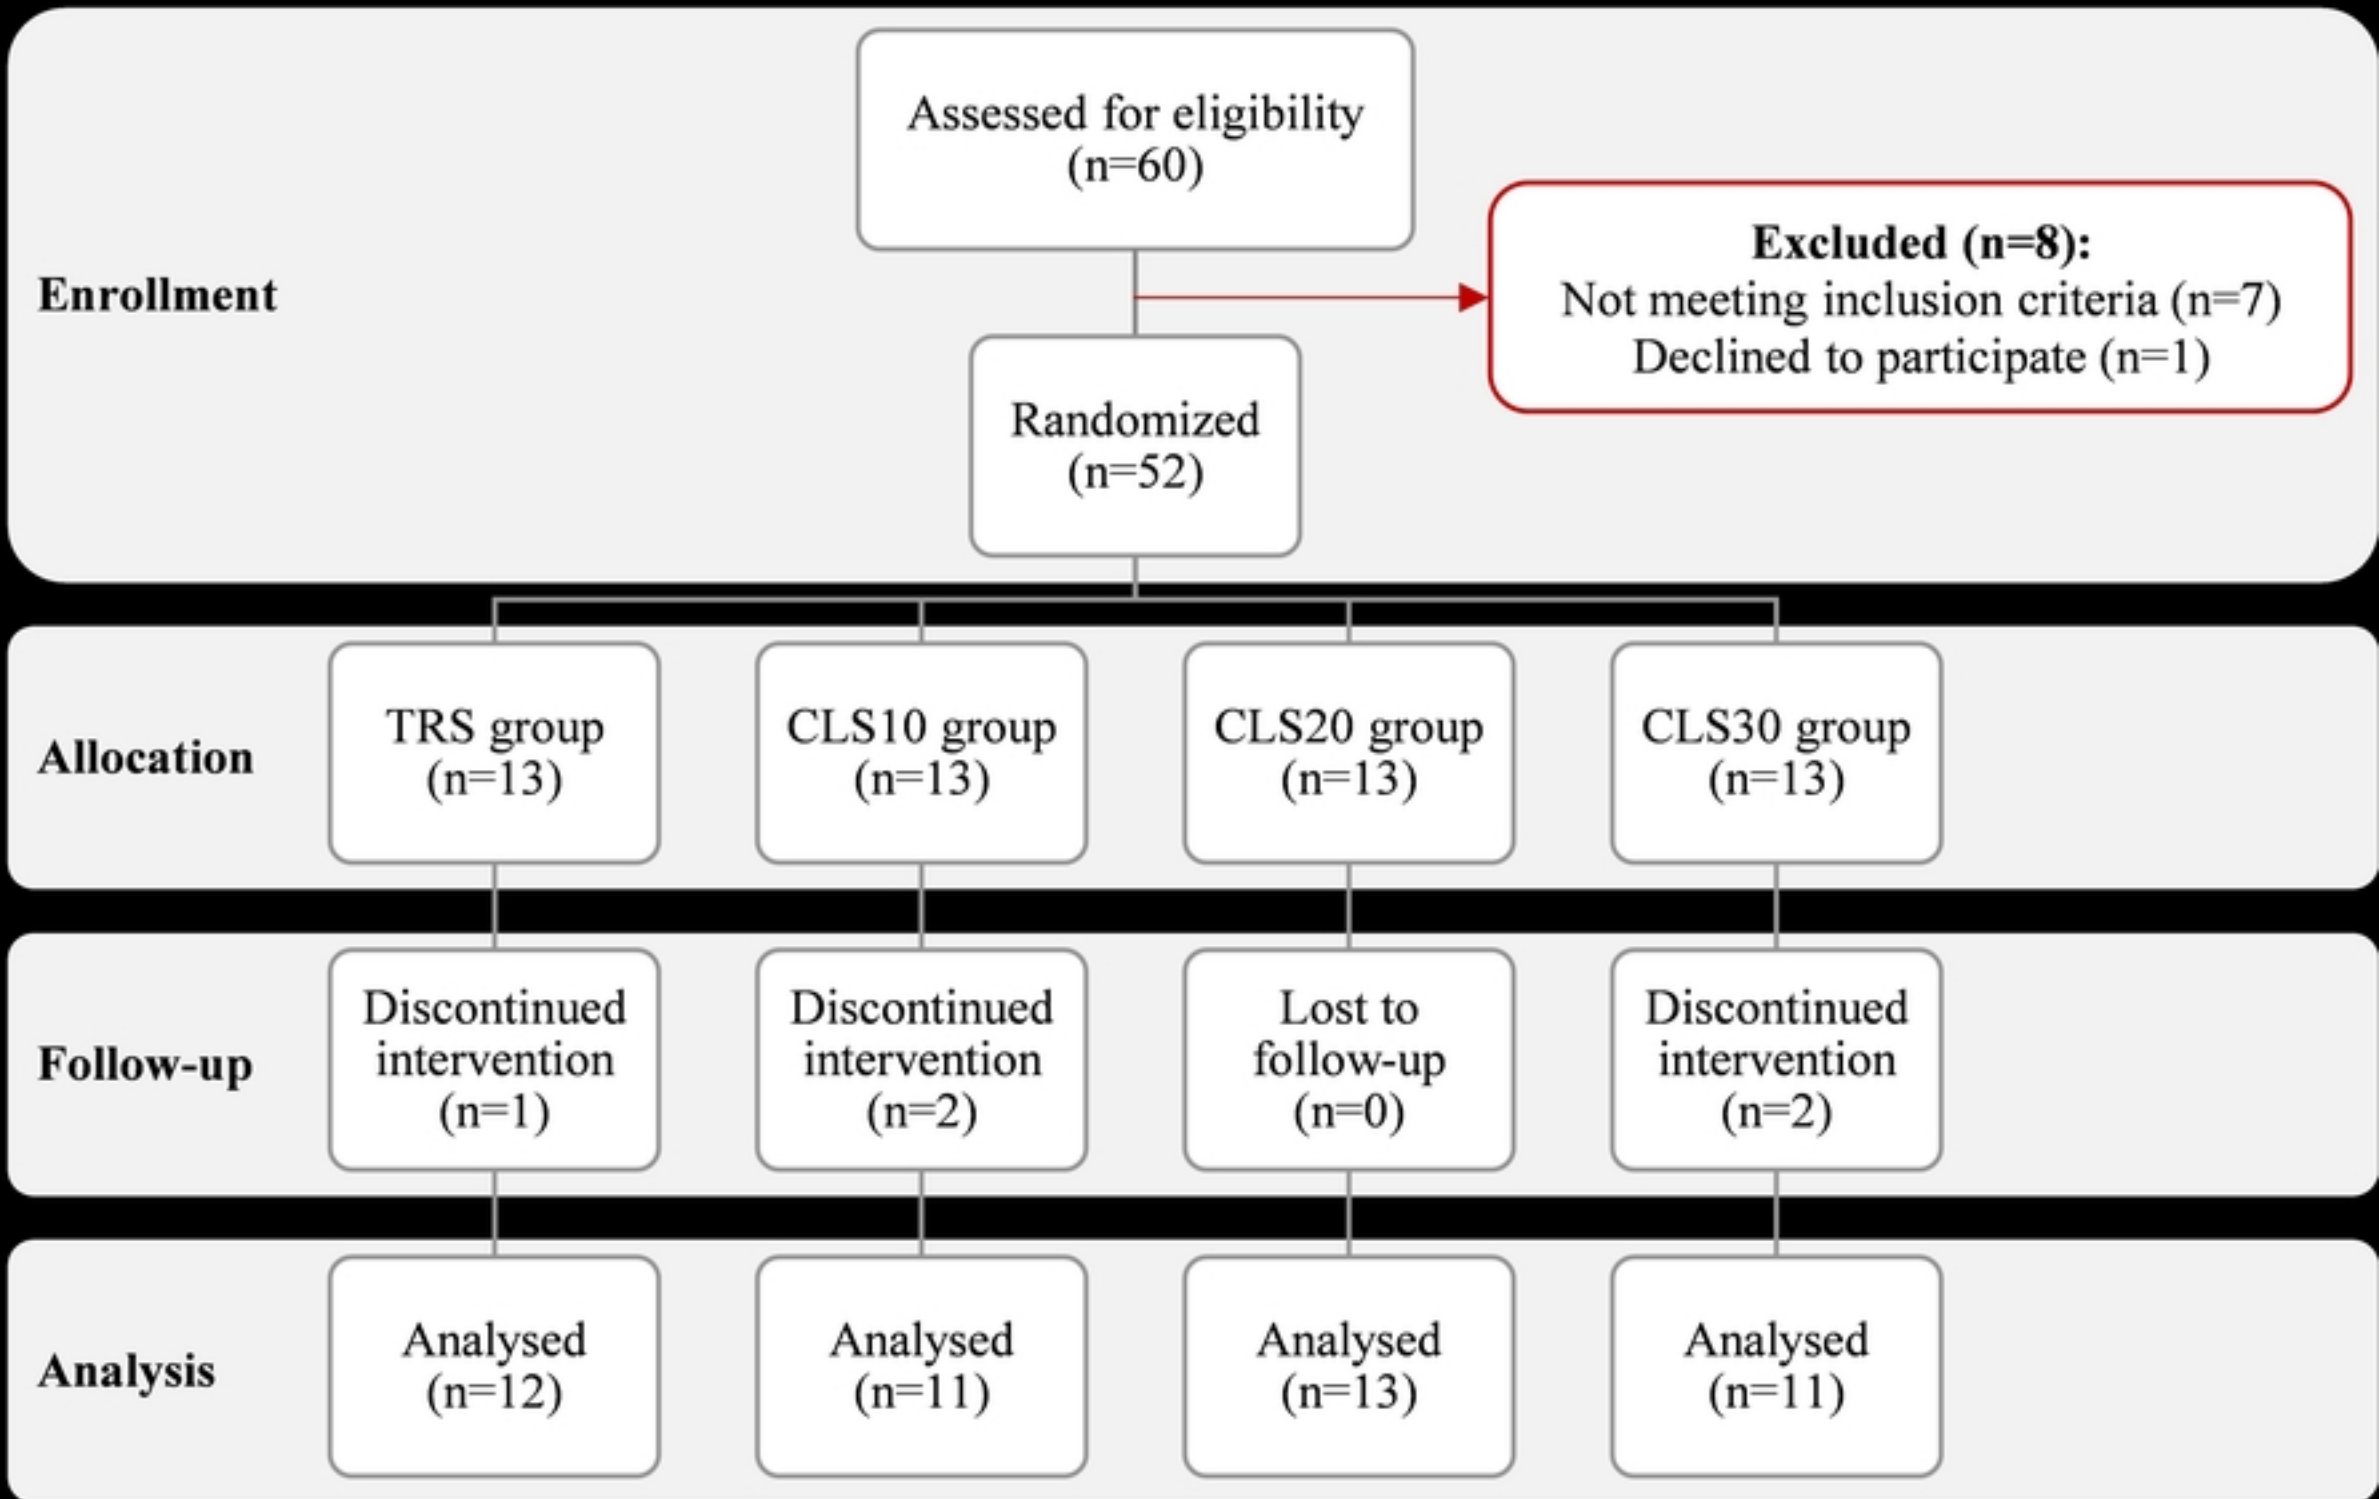

Fig 1

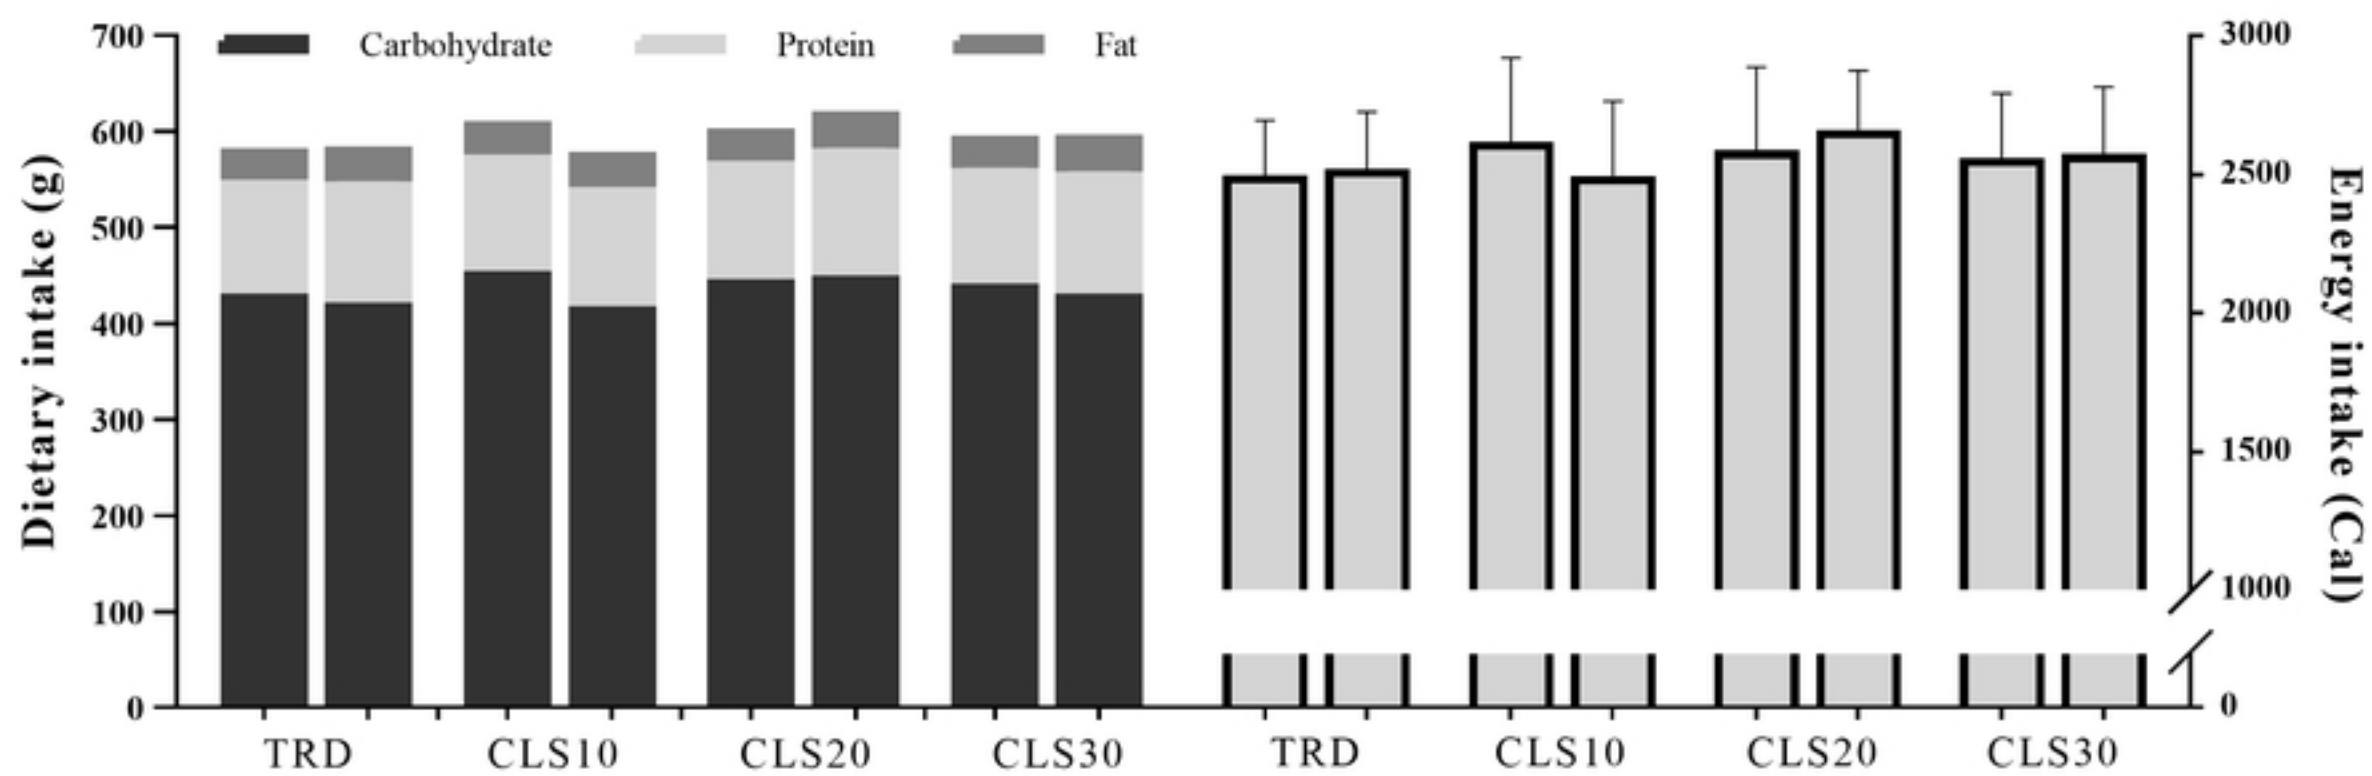

Fig 2

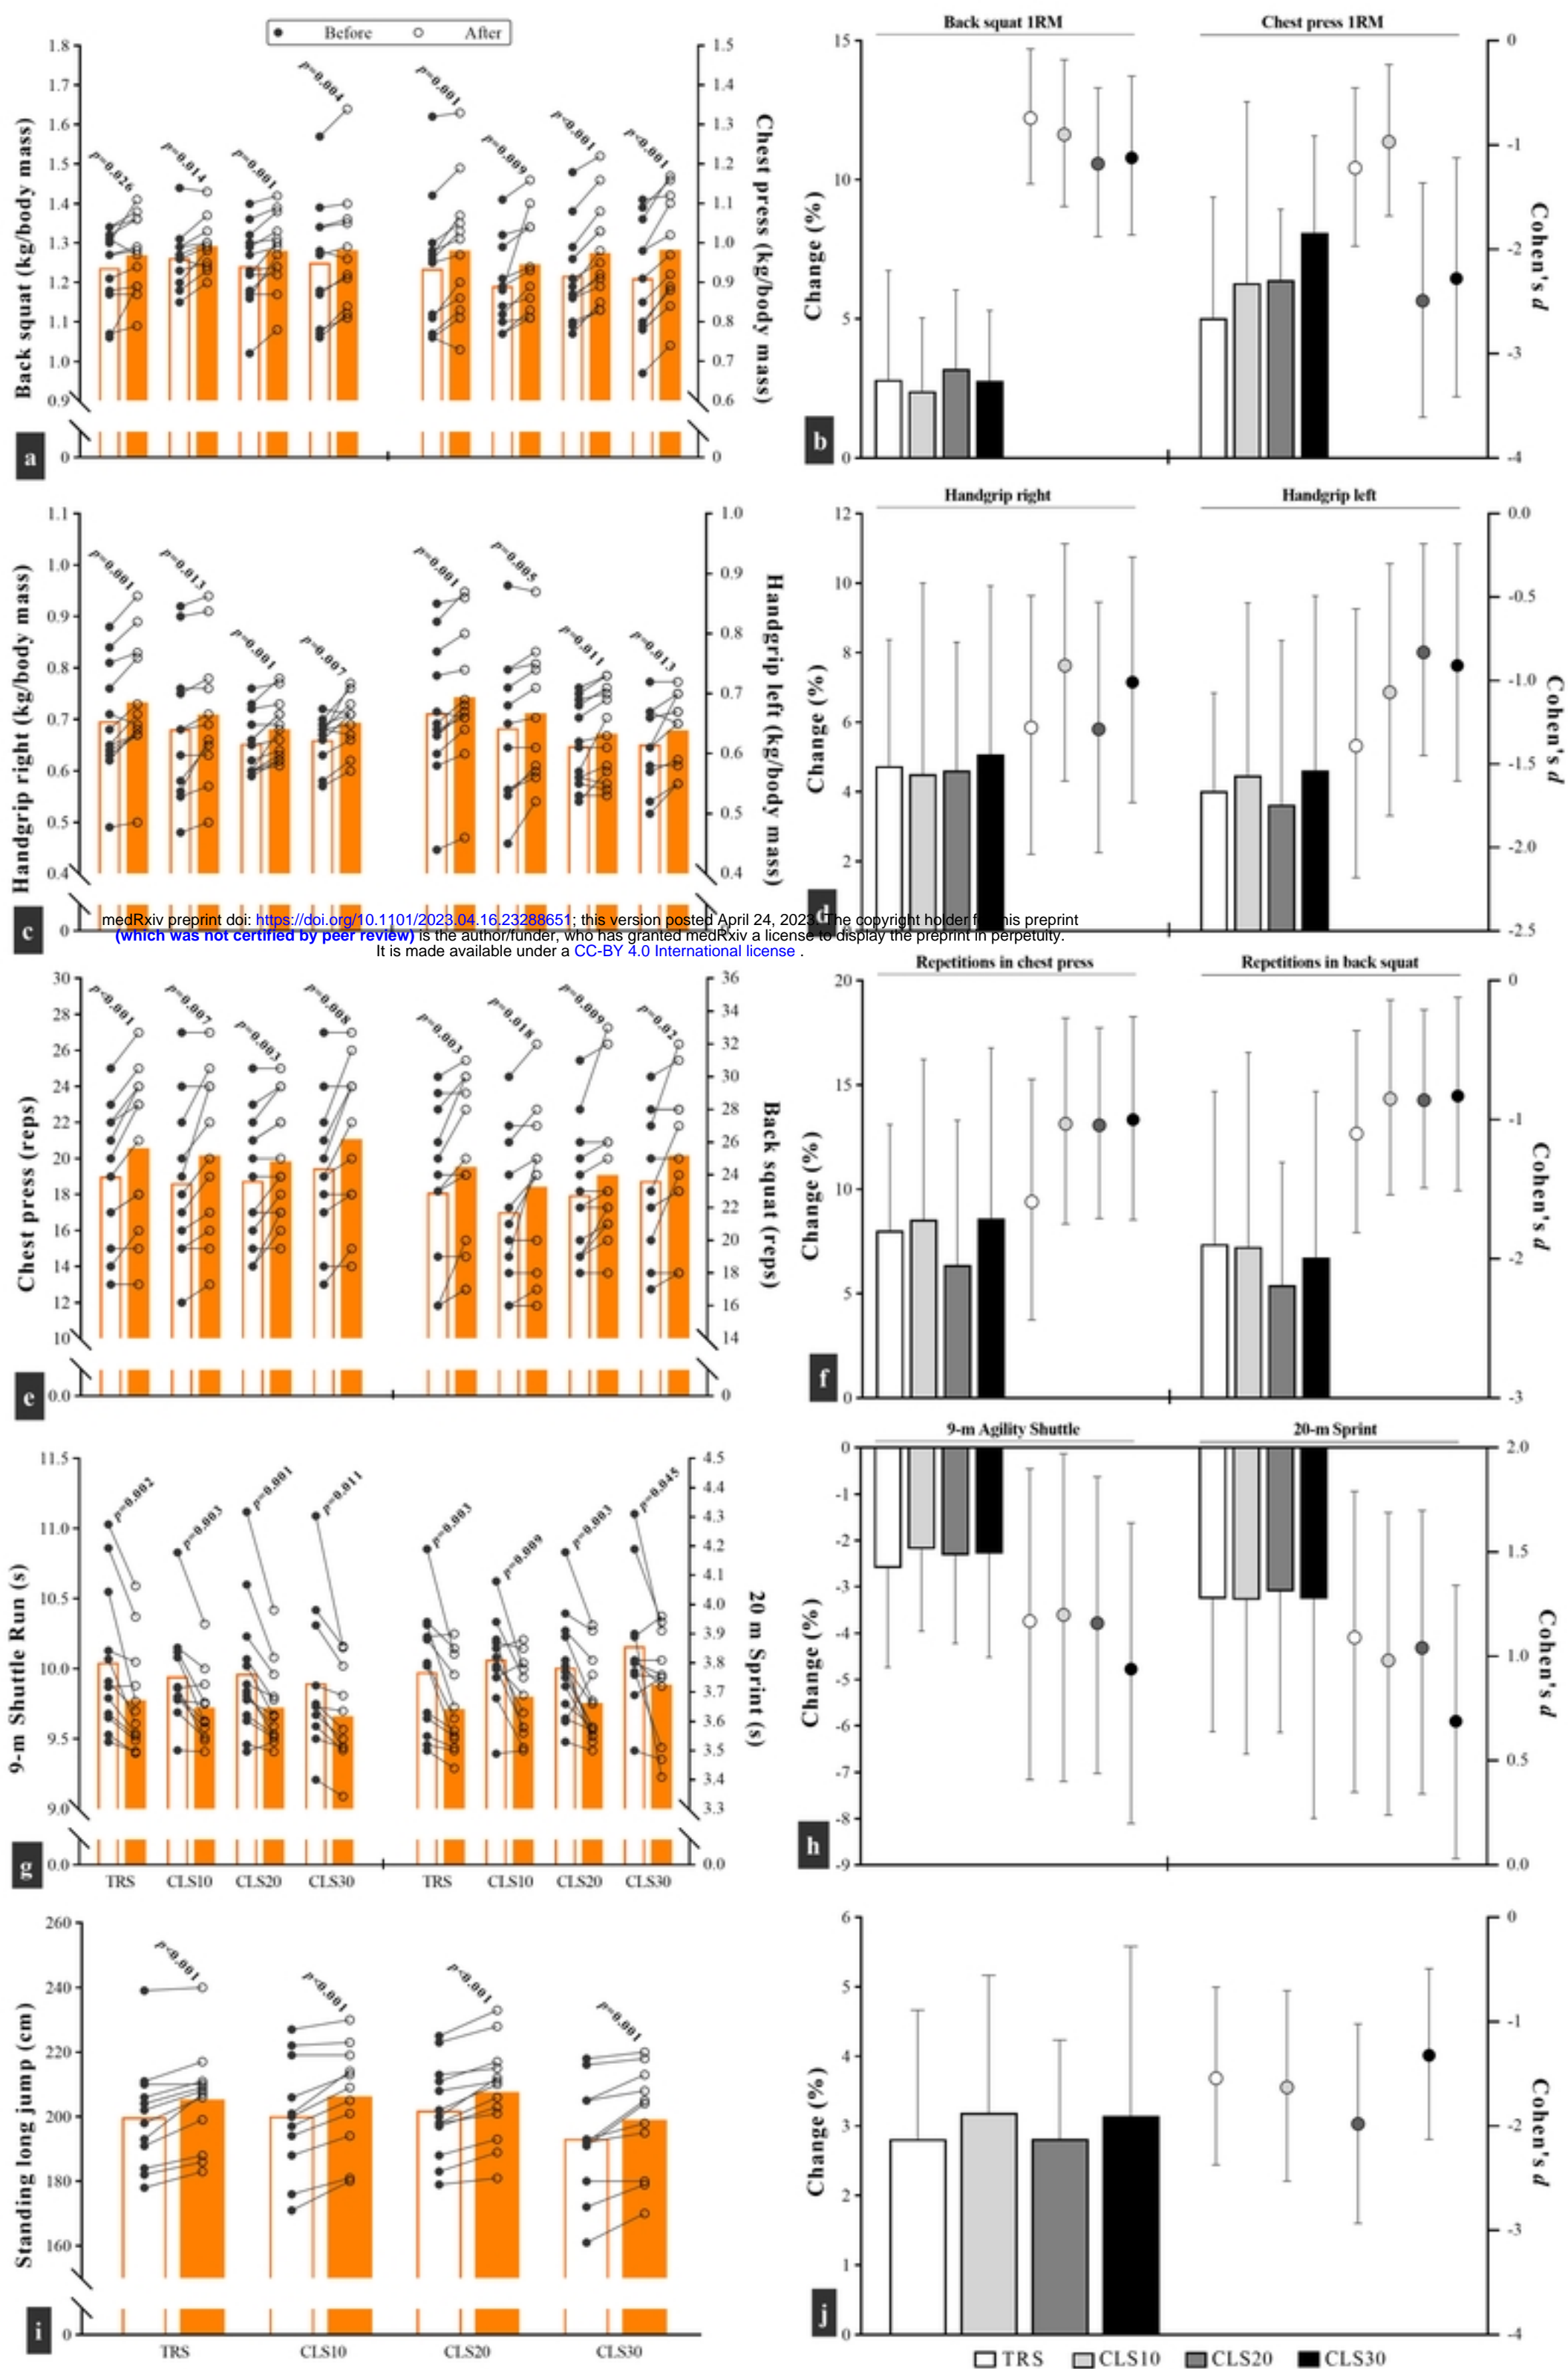

Fig 3

medRxiv preprint doi: <https://doi.org/10.1101/2023.04.16.23288651>; this version posted April 24, 2023. The copyright holder for this preprint (which was not certified by peer review) is the author/funder, who has granted medRxiv a license to display the preprint in perpetuity. It is made available under a CC-BY 4.0 International license.

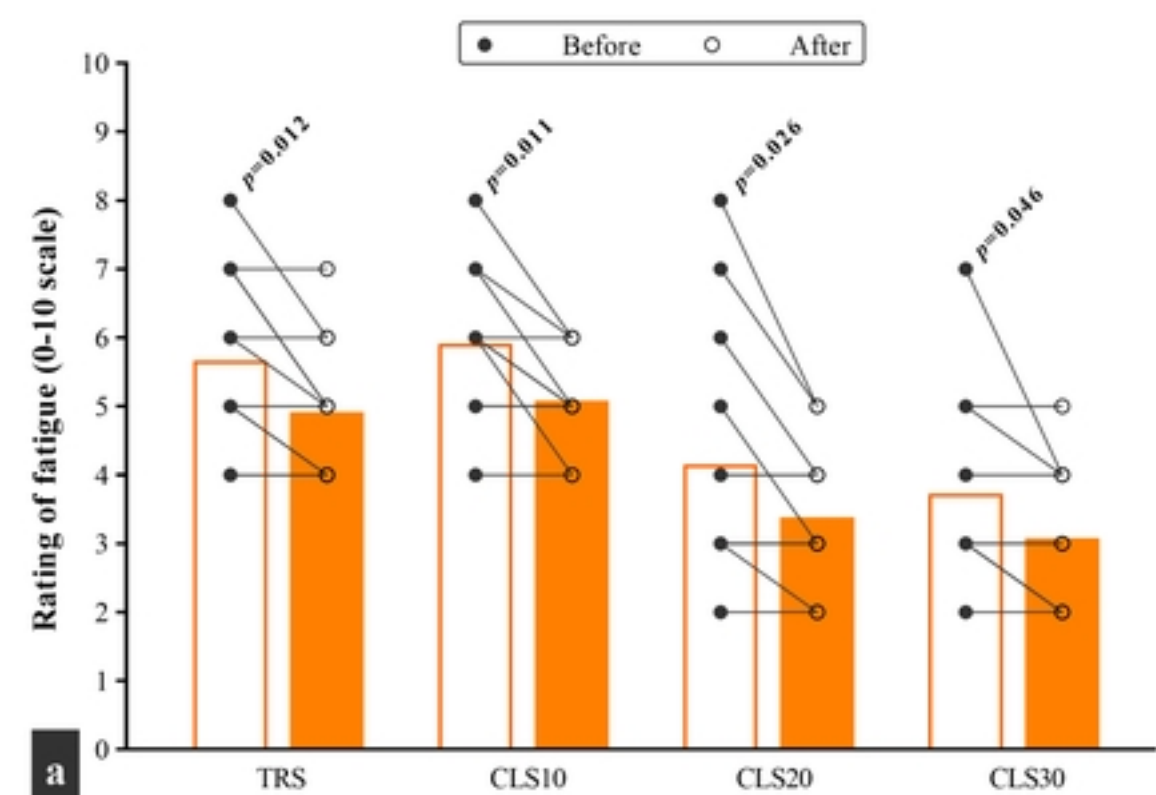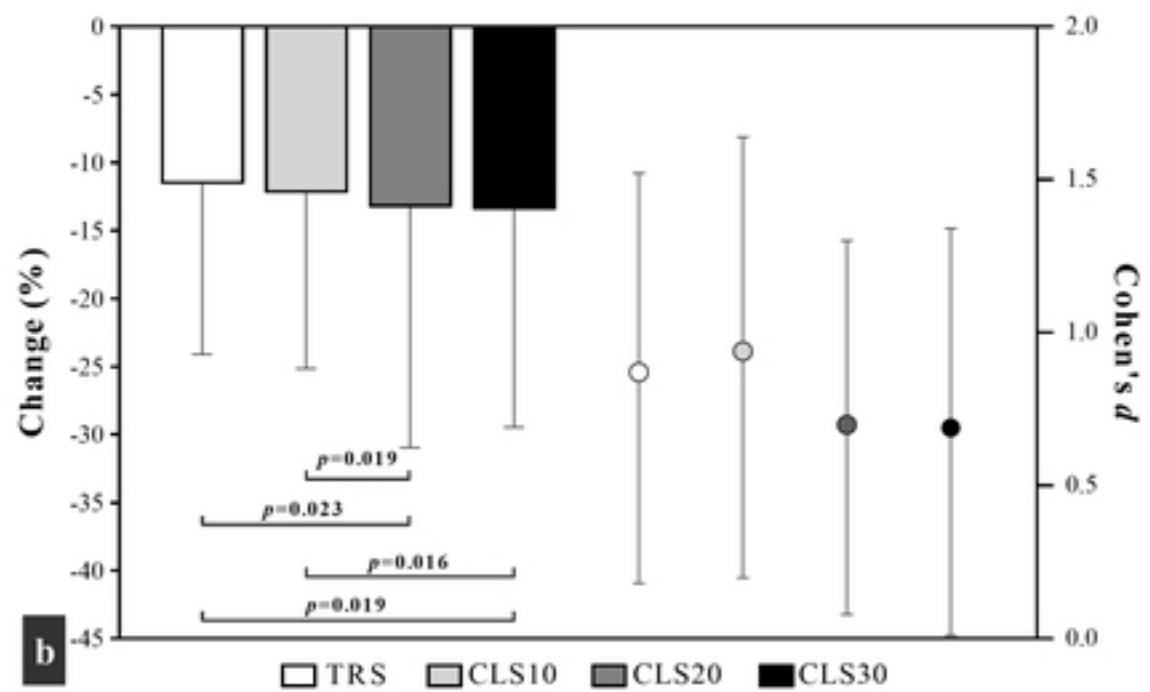

Fig 4
